# Supplementary material for: An Alternative to PCA for Estimating Dominant Patterns of Climate Variability and Extremes, with Application to US Rainfall
Source: Preprints.org preprint supplement (doi:10.20944/preprints202002.0073.v2), 2020-02-11
Supplement: Supplementary file 1 [file supplementary]

1 An alternative to PCA for estimating dominant patterns of  
2 climate variability and extremes, with application to US rainfall

3 Stephen Jewson

4 SUPPORTING INFORMATION

5 There are 8 sections of supporting information given below.

- 6 • Section 1 applies PCA and DCA to an example of a  $2 \times 2$  covariance matrix
- 7 • Section 2 applies PCA and DCA to a general diagonal  $2 \times 2$  matrix
- 8 • Section 3 contains a proof that the second DCA pattern is orthogonal to the first
- 9 • Section 4 contains a proof that the first DCA pattern contains more rain than the first PCA pattern,  
10 directly from the Lagrange cost functions
- 11 • Section 5 contains an alternative proof of the result proven in section S4, but via the method of  
12 expanding the DCA pattern in terms of PCA patterns
- 13 • Section 6 contains a proof that, if PCA and DCA patterns are scaled to a given total rainfall  
14 anomaly, then the DCA pattern has a higher Mahalanobis consistency.
- 15 • Section 7 contains a proof of the converse: that if the PCA and DCA patterns are scaled to a given  
16 value of the Mahalanobis consistency, then the DCA pattern contains more rain
- 17 • Section 8 contains a proof that there is always a scaling of the first DCA pattern that means it has  
18 both more rain and a greater Mahalanobis consistency than the first PCA pattern

## 19 1 Application of DCA to a 2x2 covariance matrix

20 We now give a worked example of PCA and DCA, applied to a 2x2 covariance matrix.

21 The direction vector we use is the uniform rainfall unit vector:  $r = \frac{1}{\sqrt{2}} \begin{pmatrix} 1 \\ 1 \end{pmatrix}$ .

22 We will consider the covariance matrix:  $C = \begin{pmatrix} 8 & 6 \\ 6 & 17 \end{pmatrix}$  with inverse  $C^{-1} = \frac{1}{100} \begin{pmatrix} 17 & -6 \\ -6 & 8 \end{pmatrix}$ .

23 The first eigenvector of this matrix, which is the first PCA pattern, is  $e_1 = \frac{1}{\sqrt{5}} \begin{pmatrix} 1 \\ 2 \end{pmatrix}$ .

24 This first PCA pattern has an angle to the x-axis of  $63^\circ$ , and an angle to  $r$  of only  $18^\circ$ . It is therefore  
25 already a reasonably rain-heavy pattern.

26 The second eigenvector, which is the second PCA pattern, is  $e_2 = \frac{1}{\sqrt{5}} \begin{pmatrix} 2 \\ -1 \end{pmatrix}$

27 This second PCA pattern has an angle to the x-axis of  $-26^\circ$ , and an angle to the direction vector  $r$  of  
28  $72^\circ$ .

29 The eigenvalues (which are the explained variances) corresponding to these eigenvectors are 20 and 5.

30 The eigenvector matrix  $E$  is written as  $E = \frac{1}{\sqrt{5}} \begin{pmatrix} 1 & 2 \\ 2 & -1 \end{pmatrix}$  and the eigenvalue matrix is  $\Lambda^2 = \begin{pmatrix} 20 & 0 \\ 0 & 5 \end{pmatrix}$

31 Given the above it is easy to verify the relations  $CE = E\Lambda^2$ ,  $E^T E = I$  and  $C = E\Lambda^2 E^T$ .

32 The first DCA vector  $g_1$  is given by  $g_1 = \frac{C r}{|C r|} = \frac{1}{\sqrt{725}} \begin{pmatrix} 14 \\ 23 \end{pmatrix}$

33 This vector has an angle to the x-axis of  $58^\circ$ , and an angle to  $r$  of  $13^\circ$ .

34 We see that  $g_1$  has a smaller angle to  $r$  than  $e_1$ .

35  $g_1$  has an explained variance of 19.9, slightly less than that of  $e_1$ , as would be expected since  $e_1$  has the  
36 highest possible explained variance of any unit vector, by construction.

37 The rainfall amounts for the first PCA and DCA patterns  $e_1$  and  $g_1$  are given by  $e_1^T r = 0.9487$  and  
38  $g_1^T r = 0.9717$ , respectively. We see that  $g_1$  has the greater rainfall amount, consistent with it having a  
39 smaller angle to  $r$ .

40 The Mahalanobis consistency values of  $e_1$  and  $g_1$  are -0.0500 and -0.0510 respectively. We see that  $e_1$   
41 has the higher likelihood, as would be expected since  $e_1$  has the lowest possible Mahalanobis consistency  
42 value of any unit vector, again by construction.

43 The interesting properties of DCA versus PCA become apparent as we gradually scale the first DCA  
44 vector  $g_1$  to make it shorter. As we reduce the length of  $g_1$ , the rainfall reduces and the Mahalanobis  
45 consistency, and hence likelihood, increases.

46 At around 0.99 of its original length the first DCA vector  $g_1$  then becomes more likely than the first PCA  
47 vector  $e_1$  since the Mahalanobis consistency of  $g_1$  increases above that of  $e_1$ . The rainfall of  $g_1$  at this  
48 point, is, however, still higher than that of  $e_1$ . We have therefore found a pattern that has both a higher  
49 likelihood and more rainfall than  $e_1$  (in fact both  $0.99g_1$  and  $0.98g_1$  have this property). If we reduce the

length of  $g_1$  further, then at around 0.97 of its original length the rainfall in the scaled  $g_1$  drops below that of  $e_1$ , and the property is lost.

In summary: before scaling, the first DCA pattern has more rain, but a lower likelihood, than the first PCA pattern. If we scale it down by a large amount, it becomes less rainy, but has a higher likelihood. However, in between there is a region in which it is both has more rain and a higher likelihood.

For this particular example, the difference between the first PCA and DCA patterns is rather small, and the region in which the DCA pattern has both more rain and a higher likelihood is also small. However, in the example in the main text we show a case where the differences are large.

## 2 Application of DCA to a general diagonal 2x2 covariance matrix

As another simple example, both PCA and DCA can easily be applied to a general *diagonal* 2x2 covariance matrix.

Once again the direction we use for DCA is the uniform rainfall unit vector:  $r = \frac{1}{\sqrt{2}} \begin{pmatrix} 1 \\ 1 \end{pmatrix}$ .

We will consider the covariance matrix:  $C = \begin{pmatrix} a^2 & 0 \\ 0 & b^2 \end{pmatrix}$  with inverse  $C^{-1} = \begin{pmatrix} \frac{1}{a^2} & 0 \\ 0 & \frac{1}{b^2} \end{pmatrix}$ .

The eigenvectors of this matrix (the two PCA patterns) are  $e_1 = \begin{pmatrix} 1 \\ 0 \end{pmatrix}$  and  $e_2 = \begin{pmatrix} 0 \\ 1 \end{pmatrix}$ .

Both eigenvectors have an angle to  $r$  of  $45^\circ$ .

The eigenvalues (the explained variances) corresponding to these eigenvectors are  $a^2$  and  $b^2$ .

The first DCA vector  $g_1$  is given by  $g_1 = \frac{Cr}{|Cr|} = \frac{1}{\sqrt{a^4+b^4}} \begin{pmatrix} a^2 \\ b^2 \end{pmatrix}$ .

$g_1$  has an explained variance of  $\frac{a^6+b^6}{a^4+b^4}$ , which is less than that of both eigenvectors unless  $a = b$ , as would be expected.

The rainfall amounts for the first PCA and DCA patterns  $e_1$  and  $g_1$  are given by  $e_1^T r = \frac{1}{\sqrt{2}}$  and  $g_1^T r = \frac{a^2+b^2}{\sqrt{2(a^4+b^4)}}$ , respectively. We see that  $g_1$  has the greater rainfall amount, unless  $a = b$ .

If we create scaled versions of  $e_1$  and  $g_1$ , that have rainfall of 1, and call them  $f_1$  and  $h_1$ , then:

$$\text{scaled first PCA pattern} = f_1 = \sqrt{2}e_1 \quad (1)$$

$$\text{scaled first DCA pattern} = h_1 = \frac{\sqrt{2(a^4+b^4)}}{a^2+b^2}g_1 \quad (2)$$

The Mahalanobis distance  $M^2$  values for these scaled vectors are:

$$M^2(f_1) = \frac{2}{a^2} \quad (3)$$

$$M^2(h_1) = \frac{2}{a^2+b^2} \quad (4)$$

and we see that  $h_1$  has the lower  $M^2$  value (has a higher likelihood), unless  $a = b$ , as expected. In other words, if we scale the first PCA and DCA patterns to have the same rainfall, the DCA pattern is more likely.

If we create scaled versions of  $e_1$  and  $g_1$  that have  $M^2 = 1$ , and again call them  $f_1$  and  $h_1$ , then:

$$\text{scaled first PCA pattern} = f_1 = ae_1 \quad (5)$$

$$\text{scaled first DCA pattern} = h_1 = \left( \frac{a^4+b^4}{a^2+b^2} \right)^{1/2} g_1 \quad (6)$$

The total rain values for these scaled vectors are then:

$$\text{rain}(f_1) = \frac{a}{\sqrt{2}} \quad (7)$$

$$\text{rain}(h_1) = \left( \frac{a^2+b^2}{2} \right)^{1/2} \quad (8)$$

and we see that  $h_1$  contains more rain, unless  $a = b$ . In other words, if we scale the first PCA and DCA patterns so that they are equally likely, the DCA pattern has more rainfall.

### 3 Proof that the second DCA pattern is orthogonal to the first

Following from the definitions, we have the relations:

$$C = XX^T \quad (9)$$

$$g_1 = \frac{Cr}{|Cr|} = \frac{Cr}{\sqrt{r^T C^2 r}} \quad (10)$$

$$X_2 = X - g_1 g_1^T X \quad (11)$$

$$= X - \frac{Crr^T CX}{r^T C^2 r} \quad (12)$$

$$C_2 = X_2 X_2^T \quad (13)$$

$$= \left( X - \frac{Crr^T CX}{r^T C^2 r} \right) \left( X^T - \frac{X^T Crr^T C}{r^T C^2 r} \right) \quad (14)$$

$$= \left( XX^T - \frac{XX^T Crr^T C}{r^T C^2 r} - \frac{Crr^T CXX^T}{r^T C^2 r} + \frac{Crr^T CXX^T Crr^T C}{(r^T C^2 r)^2} \right) \quad (15)$$

$$= \left( C^T - \frac{C^2 rr^T C}{r^T C^2 r} - \frac{Crr^T C^2}{r^T C^2 r} + \frac{Crr^T C^3 rr^T C}{(r^T C^2 r)^2} \right) \quad (16)$$

$$(17)$$

The dot product of the first and second patterns is then given by:

$$g_1^T g_2 \propto r^T C C_2 r \quad (18)$$

$$\propto r^T C \left( C^T - \frac{C^2 rr^T C}{r^T C^2 r} - \frac{Crr^T C^2}{r^T C^2 r} + \frac{Crr^T C^3 rr^T C}{(r^T C^2 r)^2} \right) r \quad (19)$$

$$\propto r^T C^2 r - \frac{r^T C^3 rr^T C r}{r^T C^2 r} - \frac{r^T C^2 rr^T C^2 r}{r^T C^2 r} + \frac{r^T C^2 rr^T C^3 rr^T C r}{(r^T C^2 r)^2} \quad (20)$$

But the first and thirds terms are equal, as are the second and fourth, and so we find:

$$g_1^T g_2 = 0 \quad (21)$$

Similar derivations can be used to show the orthogonality of the entire set of patterns  $g_1, \dots, g_n$ .

### 4 Proof that the first DCA pattern contains more rain than the first PCA pattern

Because the first PCA pattern maximises the cost function:

$$c = -g^T C^{-1} g - \lambda_1 g^T g \quad (22)$$

we know that the value of  $c$  for the first PCA pattern must be greater than the value of  $c$  for the first DCA pattern, and so:

$$-e_1^T C^{-1} e_1 - \lambda_1 e_1^T e_1 \geq -g_1^T C^{-1} g_1 - \lambda_1 g_1^T g_1 \quad (23)$$

but the patterns are normalized, so that  $\lambda_1 e_1^T e_1 = \lambda_1 g_1^T g_1 = \lambda_1$  and so the expression above simplifies to:

$$-e_1^T C^{-1} e_1 \geq -g_1^T C^{-1} g_1 \quad (24)$$

or

$$g_1^T C^{-1} g_1 - e_1^T C^{-1} e_1 \geq 0 \quad (25)$$

Similarly, because the first DCA pattern maximises the cost function:

$$c = -g^T C^{-1} g + \lambda_2 g^T r \quad (26)$$

we know that the value of this new definition of  $c$  for the first DCA pattern must be greater than the value of  $c$  for the first PCA pattern, and so:

$$-g_1^T C^{-1} g_1 + \lambda_2 g_1^T r \geq -e_1^T C^{-1} e_1 + \lambda_2 e_1^T r \quad (27)$$

or

$$g_1^T C^{-1} g_1 - e_1^T C^{-1} e_1 \leq \lambda_2 g_1^T r - \lambda_2 e_1^T r \quad (28)$$

Combining these two inequalities for  $g_1^T C^{-1} g_1 - e_1^T C^{-1} e_1$  gives:

$$\lambda_2 g_1^T r - \lambda_2 e_1^T r \geq 0 \quad (29)$$

or

$$g_1^T r \geq e_1^T r \quad (30)$$

which says that the first DCA pattern has more rainfall than the first PCA pattern.

## 5 Alternative proof that the first DCA pattern contains more rain than the first PCA pattern

First we discuss how to expand the first DCA pattern using PCA patterns, and then we prove the main result.

### 5.1 Expanding the First DCA pattern using PCA patterns

Any pattern can be written as a weighted sum of PCA patterns, and any pattern can be written as a weighted sum of DCA patterns. For instance, we can expand the first DCA pattern in terms of PCA patterns as follows.

First, we write the direction vector  $r$  in terms of the  $n$  PCA patterns as:

$$r = \sum_{i=1}^n \alpha_i e_i \quad (31)$$

then multiplying by  $C$  gives:

$$Cr = \sum_{i=1}^n \alpha_i C e_i = \sum_{i=1}^n \alpha_i \mu_i e_i \quad (32)$$

and

$$|Cr|^2 = \left( \sum_{i=1}^n \alpha_i \mu_i e_i \right)^2 = \sum_{i=1}^n \alpha_i^2 \mu_i^2 \quad (33)$$

giving the first DCA pattern as:

$$g_1 = \frac{Cr}{|Cr|} = \frac{\sum_{i=1}^n \alpha_i \mu_i e_i}{\sqrt{\sum_{i=1}^n \alpha_i^2 \mu_i^2}} \quad (34)$$

We see that  $g_1$  combines information about the direction vector (from the  $\alpha_i$ ) with information about the covariance matrix (from the  $\mu_i$ ).

### 5.2 Main result

The derivations of the first PCA and DCA patterns guarantee that the first DCA pattern has more, or the same, total rain as the first PCA pattern. However, it is of interest to prove this result bottom-up.

We first expand  $r$  in terms of eigenvectors of  $C$ , which we write as  $e_1, \dots, e_n$ , with eigenvalues  $\mu_1, \dots, \mu_n$ , giving  $r = \sum_{i=1}^n \alpha_i e_i$ .

Then the rainfall in the first PCA pattern  $e_1$  is given by:

$$e_1^T r = e_1^T \sum_{i=1}^n \alpha_i e_i = \alpha_1 \quad (35)$$

121 We also have the following relations:

$$Cr = C \sum_{i=1}^n \alpha_i e_i = \sum_{i=1}^n \alpha_i \mu_i e_i \quad (36)$$

$$r^T Cr = \left( \sum_{j=1}^n \alpha_j e_j \right) \left( \sum_{i=1}^n \alpha_i \mu_i e_i \right) = \sum_{i=1}^N \alpha_i^2 \mu_i \quad (37)$$

$$|Cr| = \sqrt{\left( \sum_{i=1}^n \alpha_i \mu_i e_i \right) \left( \sum_{i=1}^n \alpha_i \mu_i e_i \right)} = \left( \sum_{i=1}^N \alpha_i^2 \mu_i^2 \right)^{1/2} \quad (38)$$

122 and so the rainfall in the first DCA pattern  $g_1$  is given by:

$$g_1^T r = \frac{r^T Cr}{|Cr|} \quad (39)$$

$$= \frac{\sum_{i=1}^N \alpha_i^2 \mu_i}{\left( \sum_{i=1}^N \alpha_i^2 \mu_i^2 \right)^{1/2}} \quad (40)$$

123 The ratio of these rainfall amounts (first DCA pattern to first PCA pattern) is:

$$\frac{g_1^T r}{e_1^T r} = \frac{\sum_{i=1}^N \alpha_i^2 \mu_i}{\left( \sum_{i=1}^N \alpha_i^2 \mu_i^2 \right)^{1/2}} \frac{1}{\alpha_1} \quad (41)$$

$$= \frac{\sum_{i=1}^N \frac{\alpha_i^2 \mu_i}{\alpha_1^2 \mu_1}}{\left( \sum_{i=1}^N \frac{\alpha_i^2 \mu_i^2}{\alpha_1^2 \mu_1^2} \right)^{1/2}} \quad (42)$$

$$= \frac{1 + \sum_{i=2}^N \frac{\alpha_i^2 \mu_i}{\alpha_1^2 \mu_1}}{\left( 1 + \sum_{i=2}^N \frac{\alpha_i^2 \mu_i^2}{\alpha_1^2 \mu_1^2} \right)^{1/2}} \quad (43)$$

$$\geq \frac{1 + \sum_{i=2}^N \frac{\alpha_i^2 \mu_i}{\alpha_1^2 \mu_1}}{\left( 1 + \sum_{i=2}^N \frac{\alpha_i^2 \mu_i}{\alpha_1^2 \mu_1} \right)^{1/2}} \quad (44)$$

$$\geq 1 \quad (45)$$

124 and so we see that the first DCA pattern has more rainfall than the first PCA pattern, except in the case  
125  $r = e_1$ , when the patterns and rainfall are equal.

## 126 **6 Proof that the first DCA pattern has a higher log-likelihood** 127 **than the first PCA pattern, when both are scaled to a given** 128 **total rainfall**

129 The derivations of the first PCA and DCA patterns guarantee that the first DCA pattern has a higher,  
130 or the same, log-likelihood, when both are scaled to have the same total rainfall. Again, it is of interest  
131 to prove this result bottom-up.

132 Consider a given total rain amount  $c$ . We can scale both the first PCA pattern and the first DCA pattern  
133 to give exactly that rain amount using:

$$\text{scaled first PCA pattern} = f_1 = \frac{ce_1}{e_1^T r} \quad (46)$$

$$\text{scaled first DCA pattern} = h_1 = \frac{cg_1}{g_1^T r} \quad (47)$$

134 It can easily be verified that  $f_1^T r = c$  and  $h_1^T r = c$  (i.e. that both patterns contain a total rainfall of  $c$ ).

135 The  $M^2$  values of these two scaled patterns are then given by:

$$M^2(f_1) = f_1^T C^{-1} f_1 = \frac{c^2}{(e_1^T r)^2} e_1^T C^{-1} e = \frac{c^2}{\mu_1 (e_1^T r)^2} \quad (48)$$

$$M^2(h_1) = h_1^T C^{-1} h_1 = \frac{c^2}{(g_1^T r)^2} g_1^T C^{-1} g_1 = \frac{c^2}{\lambda g_1^T r} \quad (49)$$

136 The ratio of the  $M^2$  values of these two scaled patterns (PCA to DCA) is then given by:

$$\frac{M^2(f_1)}{M^2(h_1)} = \frac{f_1^T C^{-1} f_1}{g_1^T C^{-1} g_1} \quad (50)$$

$$= \frac{g_1^T r}{\mu_1 \lambda (e_1^T r)^2} \quad (51)$$

137 If we now expand  $r$  using the eigenvectors of  $C$ , as in the previous section, and use the relations:

$$r^T e_i = \alpha_i \quad (52)$$

$$g_1^T r = \lambda \sum_{i=1}^n \alpha_i^2 \mu_i \quad (53)$$

138 then:

$$\frac{M^2(f_1)}{M^2(h_1)} = \frac{\lambda \sum_{i=1}^n \alpha_i^2 \mu_i}{\lambda \mu_1 (e_1^T r)^2} \quad (54)$$

$$= \frac{\sum_{i=1}^n \alpha_i^2 \mu_i}{\mu_1 \alpha_1^2} \quad (55)$$

$$= \sum_{i=1}^n \left( \frac{\alpha_i}{\alpha_1} \right)^2 \frac{\mu_i}{\mu_1} \quad (56)$$

$$= 1 + \sum_{i=2}^n \left( \frac{\alpha_i}{\alpha_1} \right)^2 \frac{\mu_i}{\mu_1} \quad (57)$$

139 and so  $h_1$  is has the lower  $M^2$  value, and a higher log-likelihood, except in the case where  $r = e_1$ , when  
140 they are equally likely.

## 141 7 Proof that the first DCA pattern contains more rain than the 142 first PCA pattern, when both are scaled to a given likelihood

143 The derivations of the first PCA and DCA patterns guarantee that the first DCA pattern has a higher,  
144 or the same, rain when both are scaled to have the same log-likelihood. Once more, it is of interest to  
145 prove this result bottom-up.

146 Consider a value for the Mahalanobis consistency of  $c$ . We can scale both the first PCA pattern and the  
147 first DCA pattern to give exactly that Mahalanobis consistency using:

$$\text{scaled first PCA pattern} = f_1 = \left( \frac{c}{\mu_1} \right)^{1/2} e \quad (58)$$

$$\text{scaled first DCA pattern} = h_1 = \left( \frac{c}{\lambda g_1^T r} \right)^{1/2} g_1 \quad (59)$$

148 The rainfall amounts of the scaled patterns are then given by:

$$f_1^T r = \left( \frac{c}{\mu_1} \right)^{1/2} e^T r \quad (60)$$

$$h_1^T r = \left( \frac{c}{\lambda g_1^T r} \right)^{1/2} g_1^T r = \left( \frac{c g_1^T r}{\lambda} \right)^{1/2} \quad (61)$$

149 The ratio of the rainfall amounts (DCA to PCA) is then:

$$\frac{h_1^T r}{f_1^T r} = \left( \frac{g_1^T r}{\lambda \mu_1 e^T r^2} \right) \quad (62)$$

$$= \left( \frac{\sum_{i=1}^n \alpha_i^2 \mu_i}{\mu_1 \alpha_1} \right) \quad (63)$$

$$= \left( 1 + \sum_{i=2}^n \left( \frac{\alpha_i}{\alpha_1} \right)^2 \frac{\mu_i}{\mu_1} \right) \quad (64)$$

150 and so  $h_1$  contains more rainfall, except in the case where  $r = e_1$ , when they contain the same amount.

## 151 8 Proof that there's a scaling of the first DCA pattern that al- 152 ways is higher likelihood, and has more rain, than any scaling 153 of the first PCA pattern

154 Consider a scaling of the first PCA pattern:

$$f = ce_1 \quad (65)$$

155 with rain  $R_f$  and  $M^2$  values of  $M_f^2$ .

156 We know that the DCA1 pattern can be scaled so that it has more rain, and the same likelihood, compared  
157 to  $f$ . We write this pattern as:

$$h_a = ag_1 \quad (66)$$

158 with rain= $h_a^T r = ag_1^T r = R_a \geq R_f$ , and  $M^2 = h_a^T C^{-1} h_a = a^2 g_1^T C^{-1} g_1 = M_f^2$ .

159 We also know that the DCA1 pattern can be scaled so that it has the same rain, but a higher likelihood,  
160 compared to  $f$ . We write this pattern as:

$$h_b = bg_1 \quad (67)$$

161 with rain= $h_b^T r = bg_1^T r = R_b = R_f$ ,  $M^2 = h_b^T C^{-1} h_b = b^2 g_1^T C^{-1} g_1 \leq M_f^2$ , and  $a \geq b$ .

162 We can then consider any pattern with a scaling in between these two cases, such as:

$$h_m = \frac{1}{2}(a + b)g_1 \quad (68)$$

163 The rain in  $h_m$  is:

$$h_m^T r = \frac{1}{2}(a + b)g_1^T r = \frac{1}{2}ag_1^T r + \frac{1}{2}bg_1^T r = \frac{1}{2}R_a + \frac{1}{2}R_b \geq R_f \quad (69)$$

164 and so we see that the rain in  $h_m$  is greater or equal to that in  $f$ .

165 The  $M^2$  value of  $h_m$  is:

$$M_m^2 = h_m^T C^{-1} h_m \quad (70)$$

$$= \frac{1}{2}(a + b)g_1^T C^{-1} \frac{1}{2}(a + b)g_1 \quad (71)$$

$$= \frac{1}{4}(a^2 + 2ab + b^2)g_1^T C^{-1} g_1 \quad (72)$$

$$= \frac{1}{4}(M_a^2 + M_b^2 + 2M_a M_b) \quad (73)$$

$$= \frac{1}{4}(M_a + M_b)^2 \quad (74)$$

$$\leq \frac{1}{4}(2M_f)^2 = M_f^2 \quad (75)$$

166 and so we see that  $h_m$  has a greater or equal likelihood to that in  $f$ .

## 167 9 Acknowledgements

168 Many thanks to Farid Ait-Chaalal who performed the calculations, created the figures and reviewed the  
169 text. Also thanks to Stephen Cusack who wrote the original computer code, and to the various other  
170 people I have discussed this work with, including Enrica Bellone, Arno Hilberts, Jo Kaczmariska and  
171 Christos Mitas.
